# Supplementary material
Source: PubMed Central journal article supplement (PMC4901203)
Supplement: NIHMS567924-supplement-04.pdf [file NIHMS567924-supplement-04.pdf]

## Figure Legends

**Supplemental Figure S1:** *Pex1*-Knock-in / Knock-out Construct Design. The construct was designed with several important features. Most importantly, a single nucleotide substitution was introduced in exon 15 to cause the amino acid substitution p.G844D. In addition, *loxP* sites were strategically introduced within introns 11 and 13 that would yield a null allele if *Pex1*-G844D carrier or homozygous mice were crossed with a *Cre* recombinase mouse. Thus, we have the opportunity to generate germ line null mice or tissue specific knock outs.

**Supplemental Figure S2:** *Pex1* Mouse and Human Protein Alignment. Alignment of the human PEX1 and murine *Pex1* amino acid sequences shows that the orthologous human PEX1-p.G843D and murine *Pex1*-p.G844D amino acids reside in a highly conserved sequence tract.

**Supplemental Figure S3:** PEX14 Immunostaining in *Pex1*-G844D and Wild Type Mice. The number and size of peroxisome structures are qualitatively similar in the cell lines derived from *Pex1*-G844D and wild type mouse pups.
